# Supplementary material for: Multiple functionalization of tungsten disulfide inorganic nanotubes by covalently grafted conductive polythiophenes
Source: Royal Society of Chemistry journal article supplement (doi:10.1039/c6ra19628d), 2016-01-01
Supplement: c6ra19628d1.pdf [file c6ra19628d1.pdf]

## Supporting Information

### **Multiple Functionalization of Tungsten Disulfide Inorganic Nanotubes by Covalently Grafted Conductive Polythiophenes**

Rivka Ben Ishay,<sup>‡</sup> Yifat Harel,<sup>‡</sup> Ronit Lavi, Jean-Paul Lellouche\*

*Department of Chemistry, Nanomaterials Research Center, Institute of Nanotechnology &  
Advanced Materials, Bar-Ilan University, Ramat-Gan 5290002, Israel.*

\*Corresponding Author: Prof Jean-Paul Moshe Lellouche;

Email: [jean-paul.m.lellouche@biu.ac.il](mailto:jean-paul.m.lellouche@biu.ac.il); Tel: 972-3-5318324; Fax: 972-3-7384053.

<sup>‡</sup>These authors contributed equally to the paper.

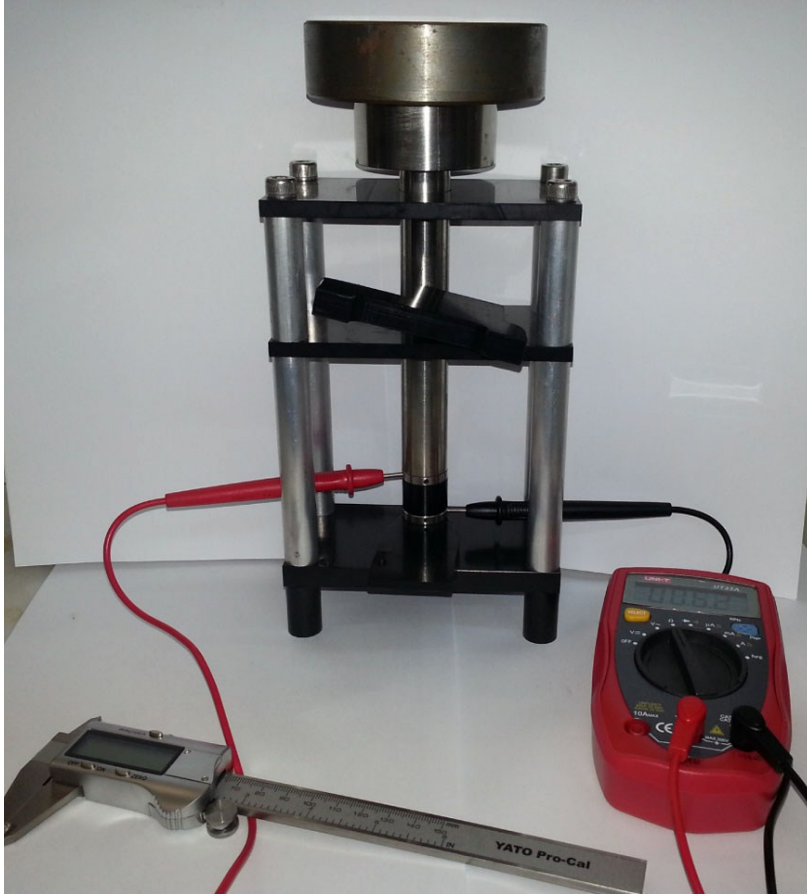

**Figure SI-1.** The Powder Resistivity Measuring System.

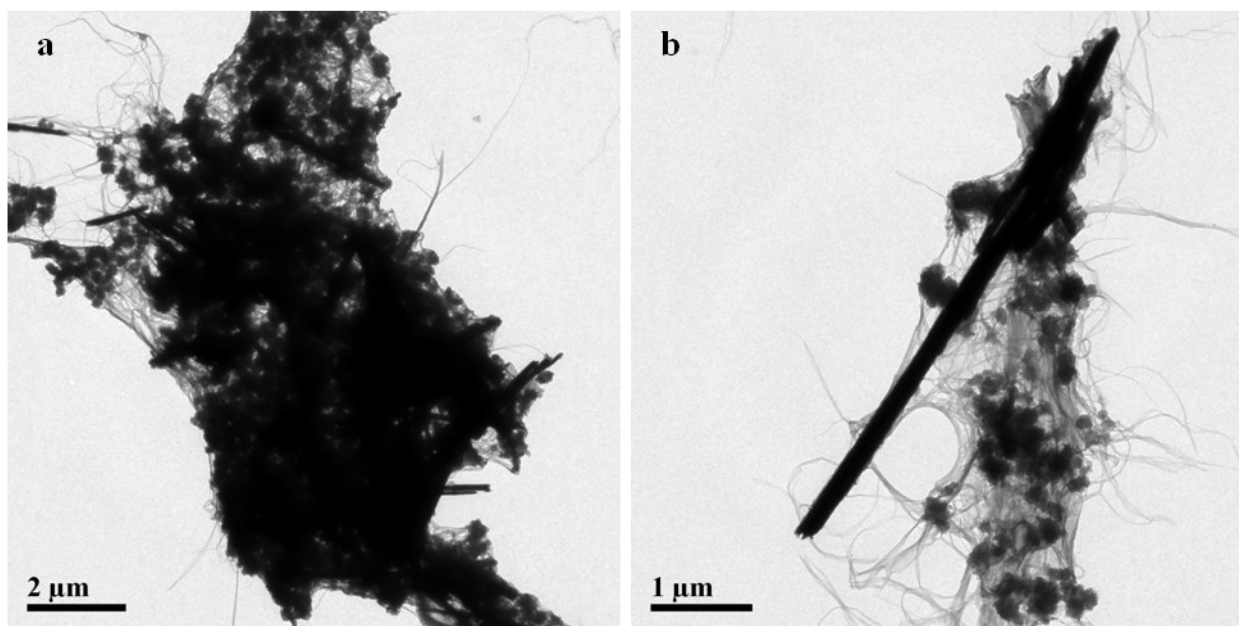

**Figure SI-2.** TEM (a, b) images of PEDOT bulk polymerization in the presence of non functional-WS<sub>2</sub> INTs.

In order to compare the TGA analyses involving both of the polyTh-WS<sub>2</sub> INTs composites and the crude polymers, the TGA measurements were also performed for all of the crude polymers. Figure SI-3 shows the DTG plots of the polyTh-WS<sub>2</sub> INTs composites and the corresponding crude polymers. According to this figure, the same DTG pattern is also observed for the polymer-modified INTS and their respective crude polymers.

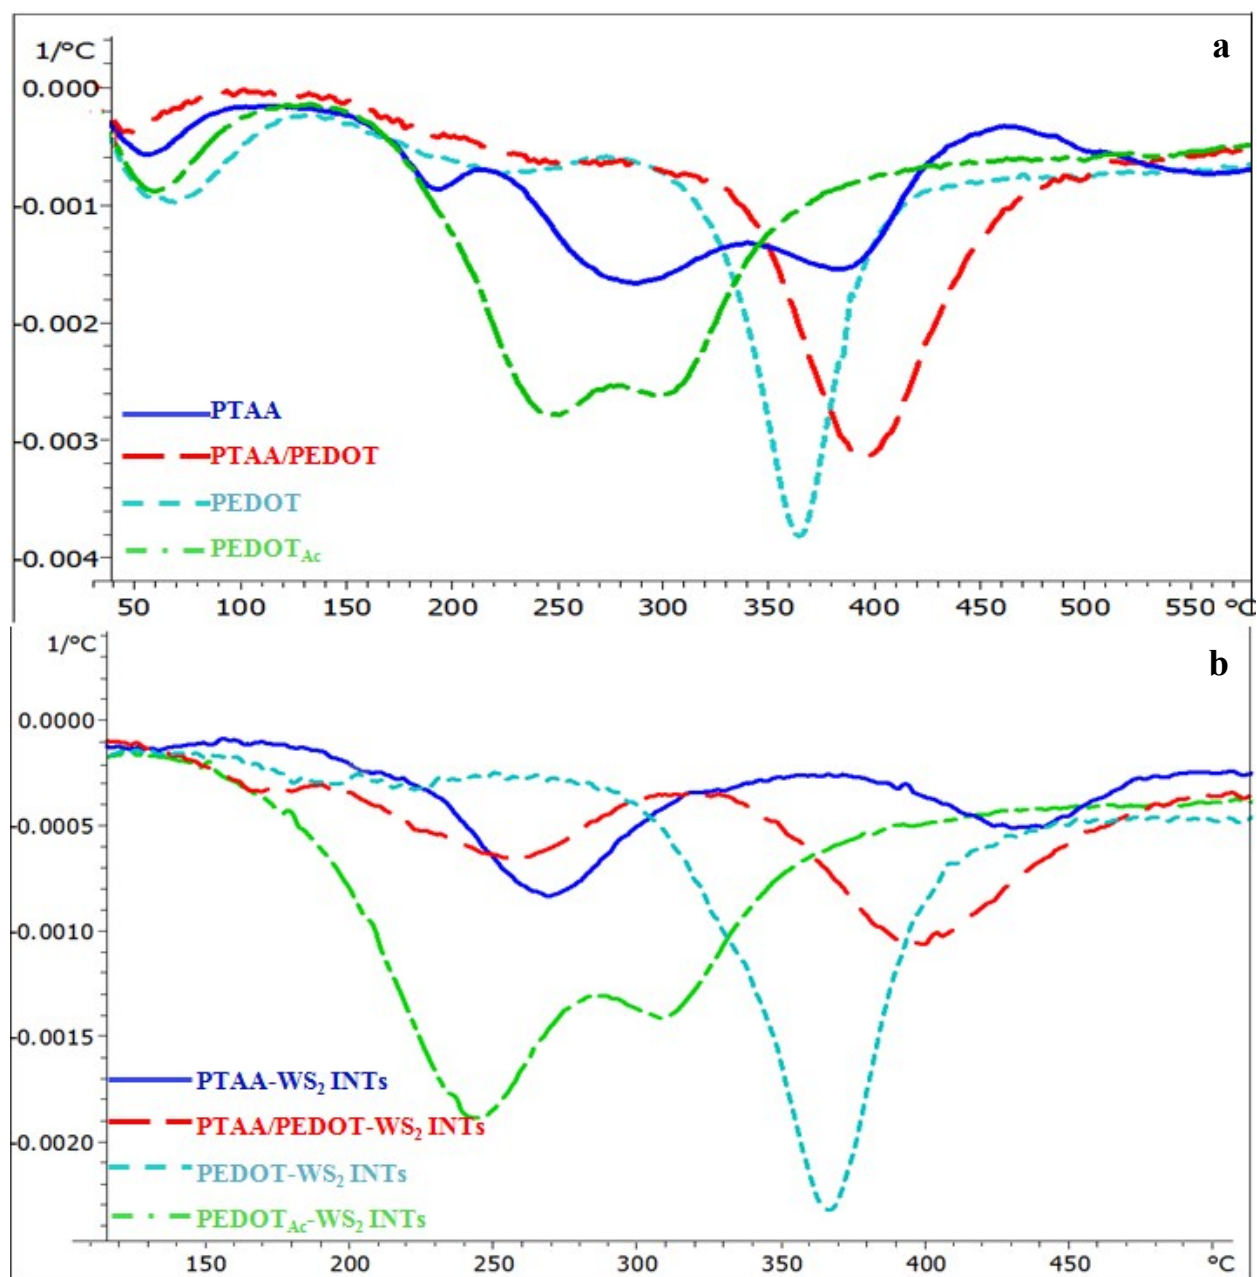

**Figure SI-3.** The 1<sup>st</sup> derivative (DTG) plots of (a) crude polyTh-polymers and (b) of the relating polyTh-WS<sub>2</sub> INT composites.

Figure SI-4 shows the FT-IR spectrum of the neat polyTh-polymers. It can easily be seen that the C=O stretch at  $\sim 1700\text{ cm}^{-1}$  is absent in the spectrum of the PEDOT-WS<sub>2</sub> INTs composites.

Moreover, the peaks that correspond to the C-O-C stretchings of the ethylenedioxy group/functionality at  $\sim 1200$  and  $1100\text{ cm}^{-1}$  clearly appeared in all of the three types of composites containing the PEDOT structure. As expected, such peaks are missing in the PTAA spectrum. The peaks in the range of  $2980\text{--}3150\text{ cm}^{-1}$  are attributed to the C-H stretchings of the ethylene groups.

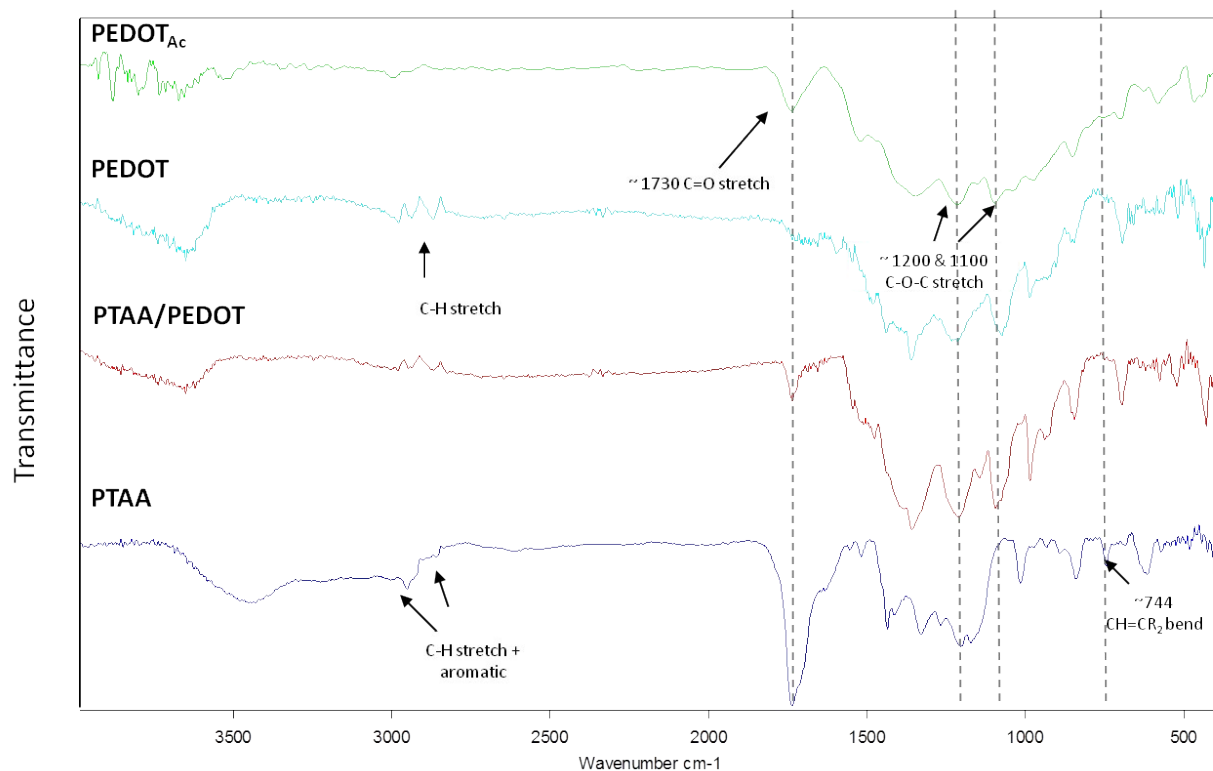

**Figure SI-4.** The FT-IR spectra of the entire crude polyTh-polymers.
